# Supplementary material
Source: PubMed Central journal article supplement (PMC3121459)
Supplement: supp_M111.237438_Supp.pdf [file supp_M111.237438_Supp.pdf]

**METHYLBUTENOL SYNTHASE: BIOCHEMICAL CHARACTERIZATION, HOMOLOGY MODELING, AND IMPLICATIONS FOR UNDERSTANDING HEMITERPENE SYNTHASE EVOLUTION IN PLANTS**

**Dennis W. Gray, Steven R. Breneman, Lauren A. Topper, Thomas D. Sharkey**

Supplementary material

**Table S1**  
**PCR Primers used to clones and express MBO synthase**

| Primer ID                       | Sequence 5'-3'                                       | Usage                 |
|---------------------------------|------------------------------------------------------|-----------------------|
| Oligo(dt) <sub>17</sub>         | TTTTTTTTTTTTTTTTTT                                   | cDNA synthesis        |
| Oligo(dt) <sub>17</sub> .adapt1 | GACTCGAGTCGACATCGATTTTTTTTTTTTTTTTTTT                | cDNA synthesis        |
| Adapt1                          | GACTCGAGTCGACATCG                                    | 3'RACE                |
| PsabMBO 1F                      | TTCAGACTTGGATTTGCCAAAATCTTT                          | 3'RACE                |
| Pon3.1R                         | CTCTCCCTCTGTTTGAATGGCCGAACATGC                       | 5'RACE                |
| Pon4.1R                         | ATTGGAGGGGGTGATTAATTCTCCATCTTT                       | 5'RACE                |
| Pon 4.11F                       | GAATTCAGTTCATTATTTTGAGCTGC                           | Full length amplicon  |
| Pon4.9R                         | ACCGTCATTGAGCCTGTGCCTTTATAA                          | Full length amplicon  |
| Ppon4.14aF Nco1                 | c <u>catgg</u> <u>GT</u> AGACGCATAGCAAATCATCATTCCAAC | Expression constructs |
| Ppon4.10R Sac1                  | gagctcAAAGGCACAGGCTCAATGACGGTTGT                     | Expression constructs |

All primers shown in a 5'-3' orientation. Lowercase letters indicate restriction sites, Underlined nucleotides were added to achieve the correct reading frame.

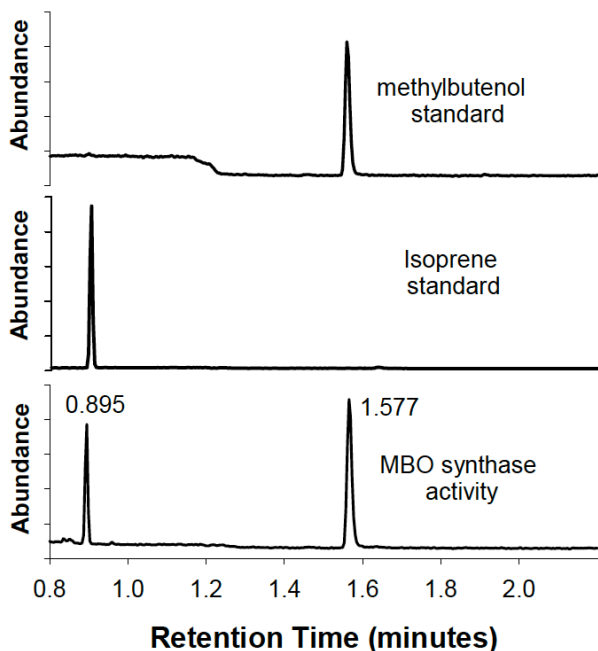

Fig. S1. GC/MS total ion trace showing retention times of authentic isoprene and MBO standards, and the corresponding isoprene and MBO peaks obtained from a typical MBO synthase enzyme assay. A 2-ml sample of gas phase standard or headspace from the MBO synthase assay was cryotrapped directly on the GC column (DB-5 column, Agilent; 10-m length, 0.1-mm I.D., and 0.34  $\mu\text{m}$  film thickness) on a Agilent 6890N GC (Agilent) coupled to a 5975B mass selective detector) and desorbed at 40°C isothermally. MBO assays were incubated with 10 mM DMADP at 37°C for 60 min prior to injection.

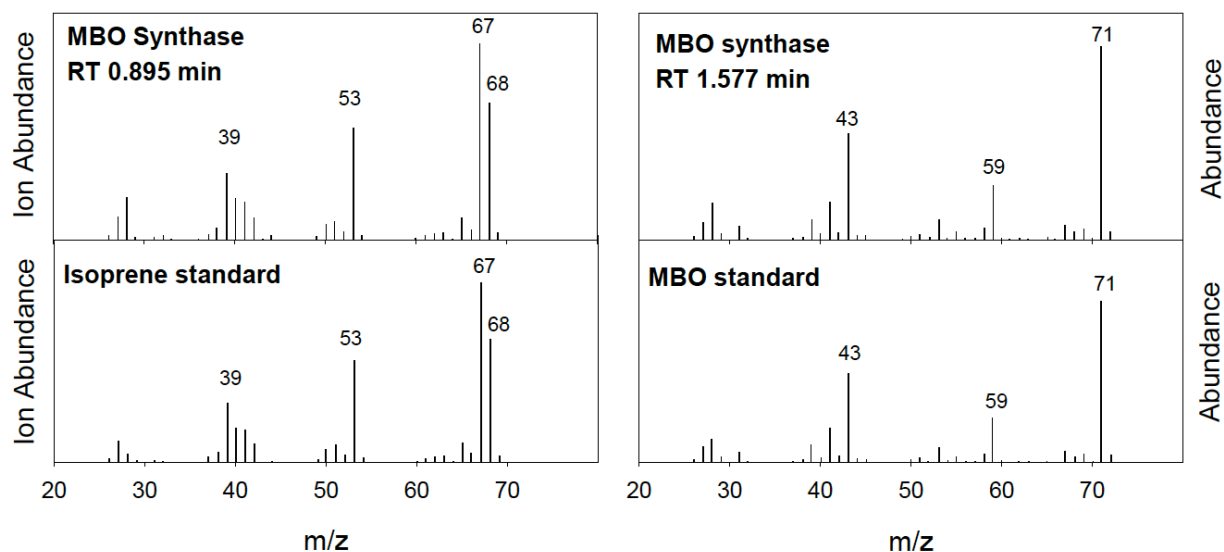

Fig. S2. Mass spectra of authentic isoprene and MBO standards and the corresponding isoprene and MBO peaks identified by GC retention time. A 2-ml sample of gas phase standard or headspace from the MBO synthase assay was cryotrapped directly on the GC column and desorbed at 40°C isothermally. No molecular ion ( $m/z=86$ ) was detected in the MBO spectrum. Other details as for Fig. S1.

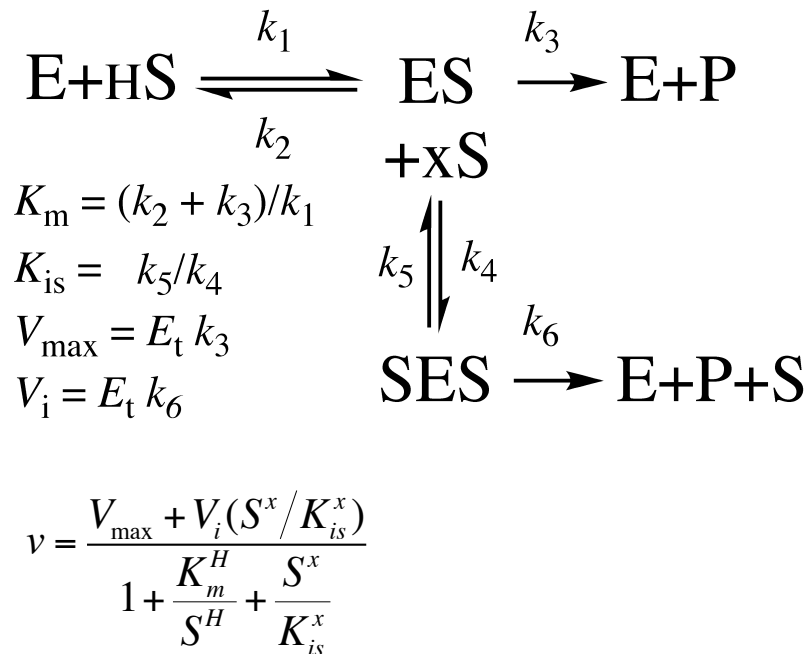

Fig. S3. Enzyme kinetic model allowing cooperativity and cooperative substrate inhibition adapted from (1,2). H = the Hill coefficient describing cooperativity,  $K_{is}$  is the binding affinity of the substrate to the enzyme-substrate complex, and x = the number of substrate molecules that could bind to and inactivate the enzyme substrate complex. This model allows the substrate-inhibited form of the enzyme to have some activity but fitting many data sets did not support this possibility for hemiterpene synthases and so was not used in this study. Unrealistic values of some parameters can give good fits so following the suggestion of LiCata and Allewell,  $K_{is}$  was constrained to be  $\geq K_m$  and x was constrained to be  $\leq 2$ .

1. Pastra-Landis, S. C., Evans, D. R., and Lipscomb, W. N. (1978) *J. Biol. Chem.* **253**, 4624-4630
2. LiCata, V. J., and Allewell, N. M. (1997) *Biophys. Chem.* **64**, 225-234
